# Supplementary material
Source: Copernicus journal article supplement (doi:10.5194/egusphere-2026-2928)
Supplement: Supplementary file 1 [file egusphere-2026-2928-supplement.pdf]

The following figures show the data that the statistics shown in the main article are comprised of. In each figure, panel (a) shows reflectivity, panel (b) shows the results from the peak finding method described in the main article, and panels (c) and (d) show example spectrograms. The vertical black lines in panel (b) show the times that the spectrograms in panels (c) and (d) were taken from.

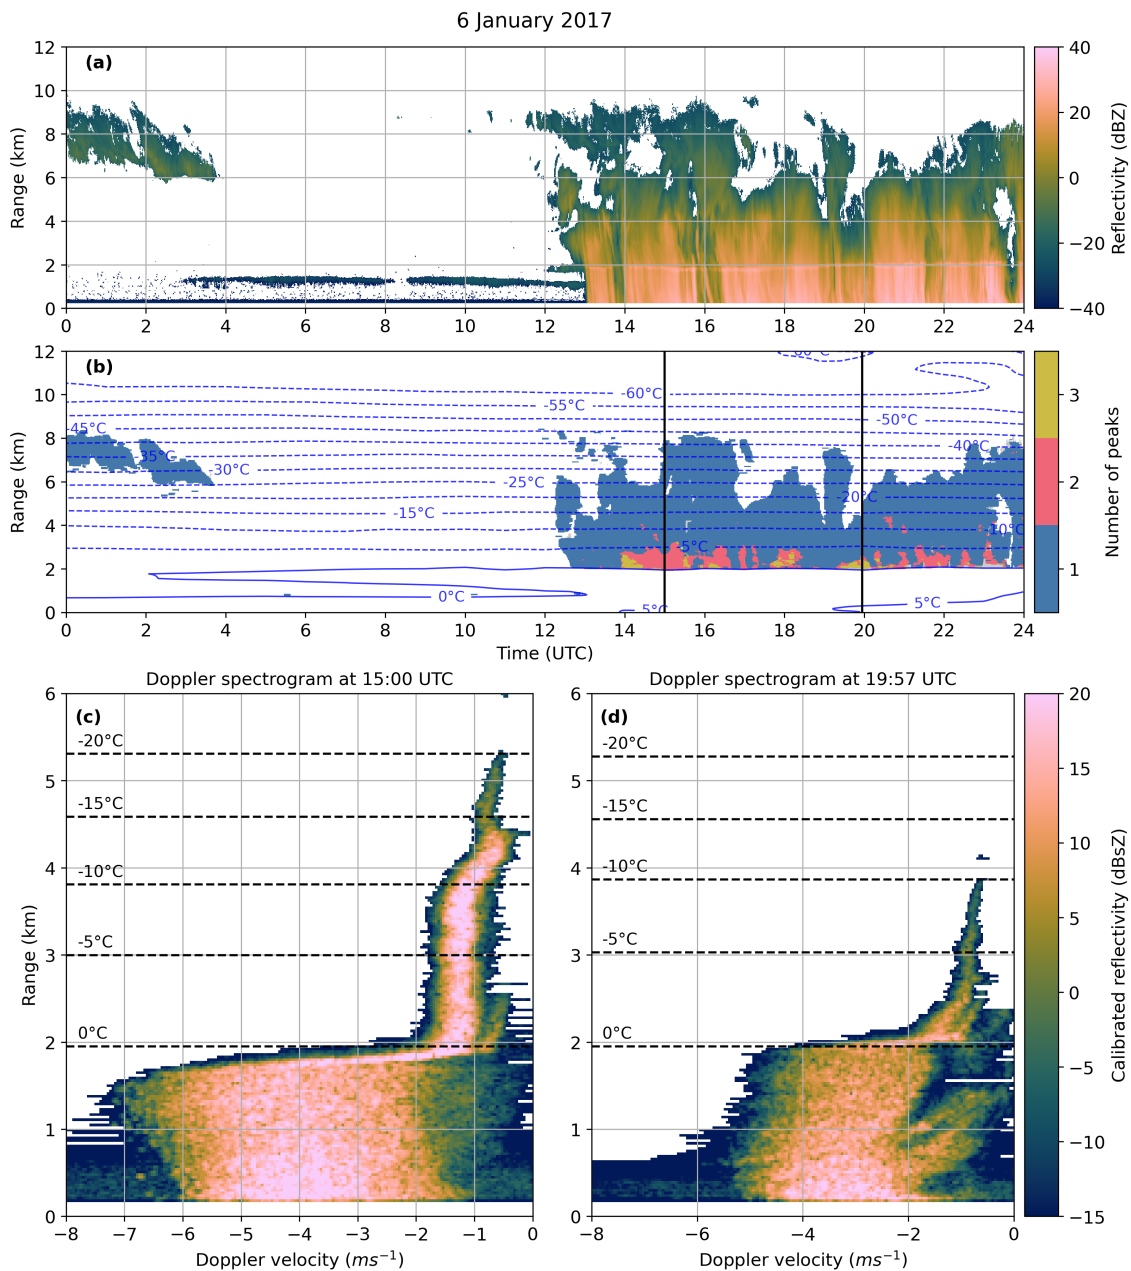

**Figure S1.** Reflectivity (a), peak finding results (b) and example spectrograms (c) and (d) for 6 January 2017.

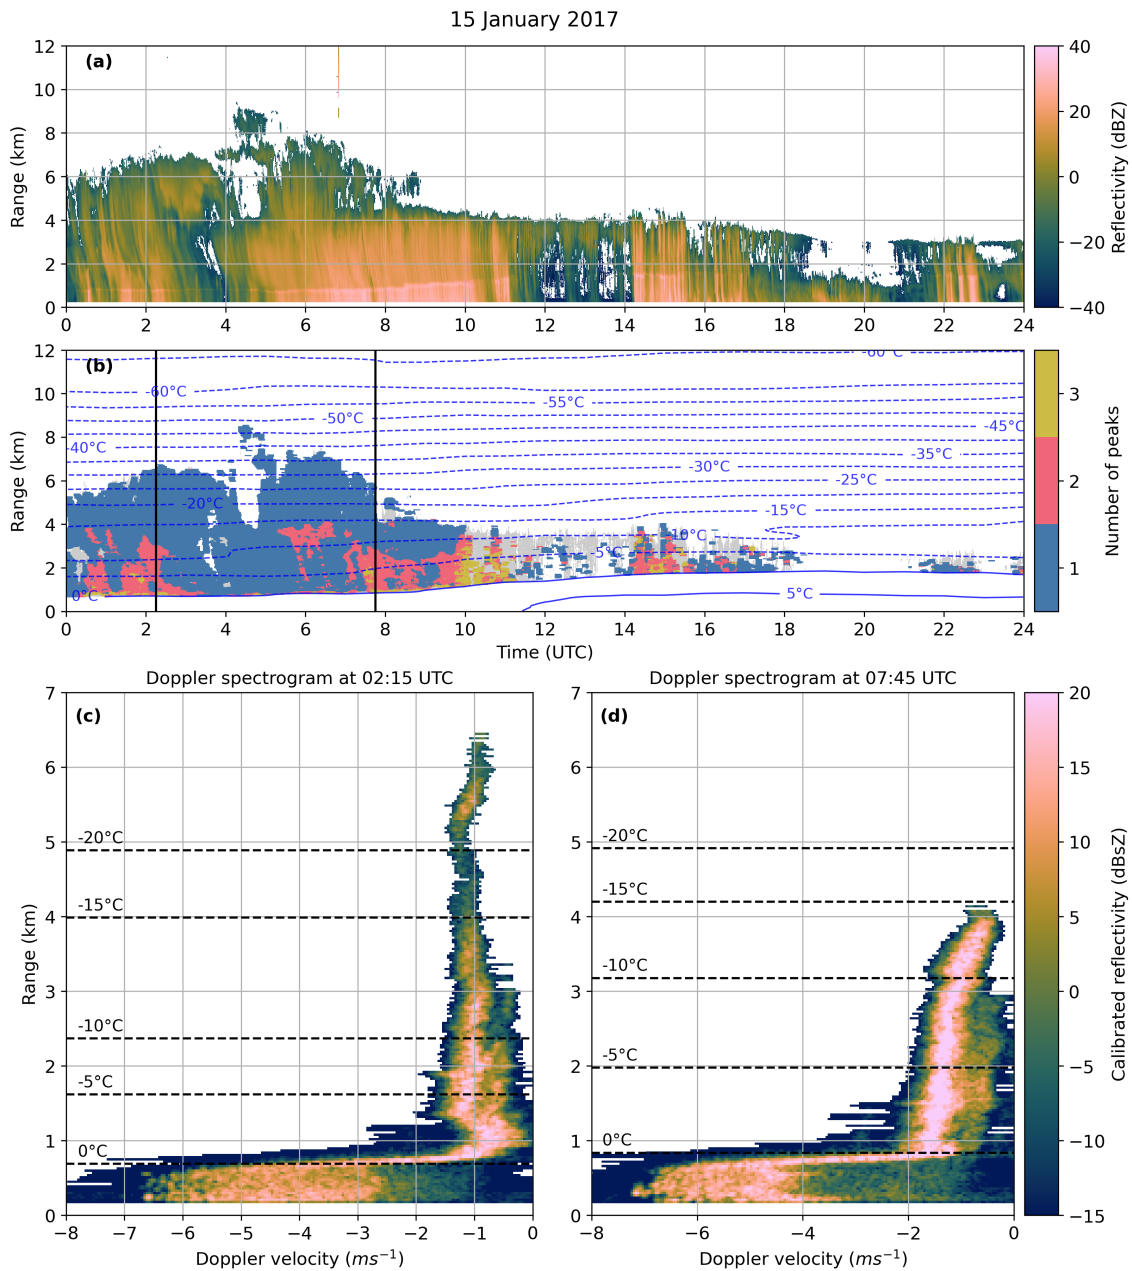

**Figure S2.** Reflectivity (a), peak finding results (b) and example spectrograms (c) and (d) for 15 January 2017.

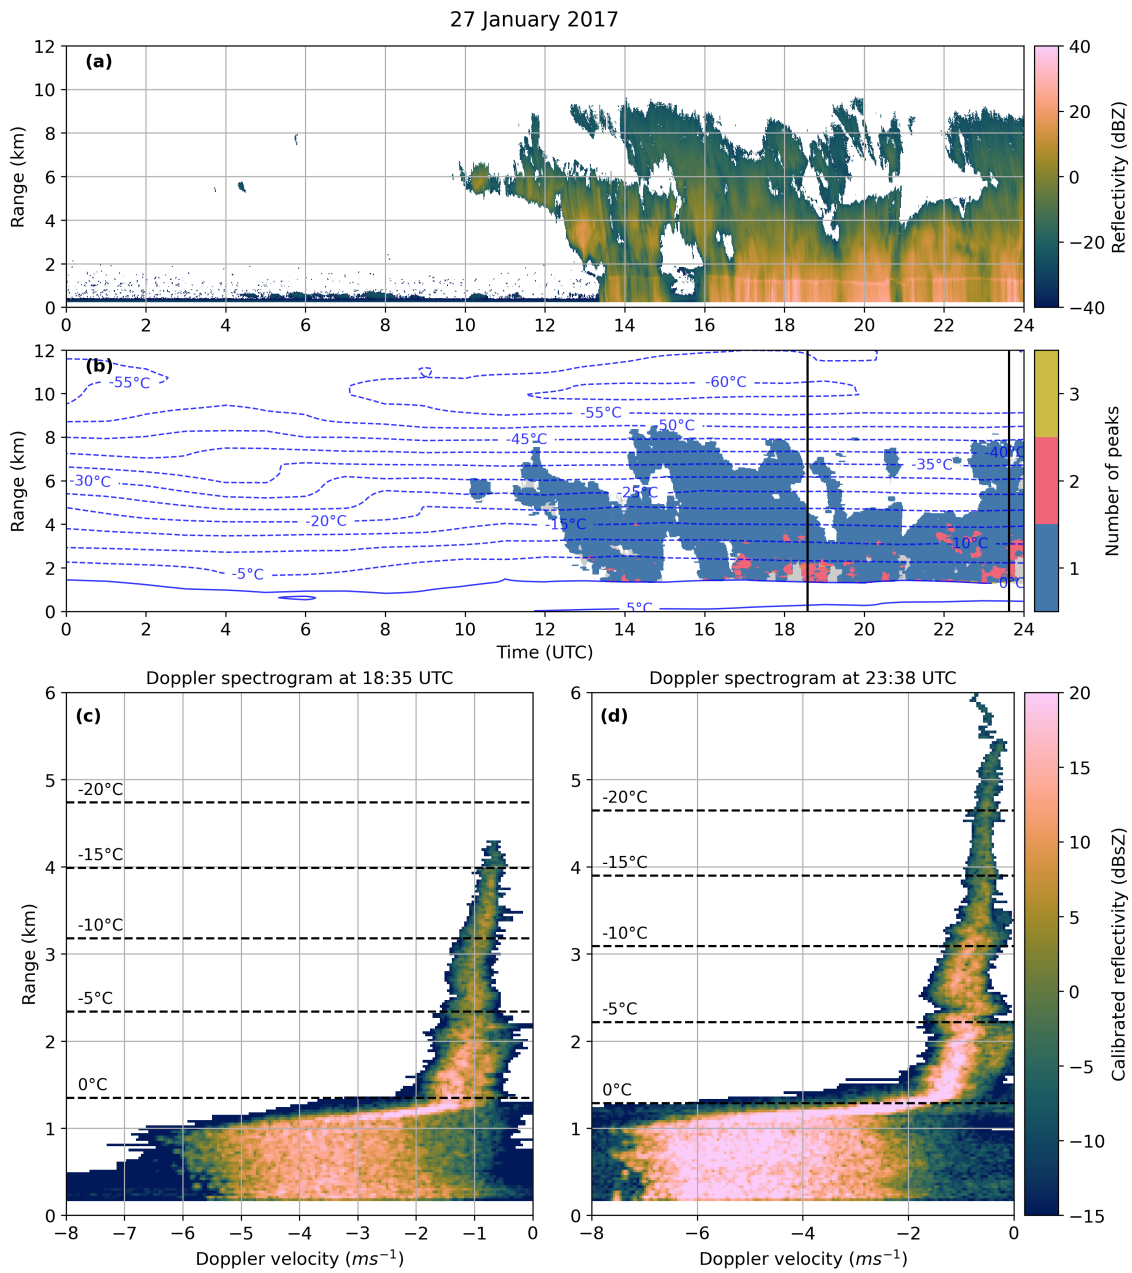

**Figure S3.** Reflectivity (a), peak finding results (b) and example spectrograms (c) and (d) for 27 January 2017.

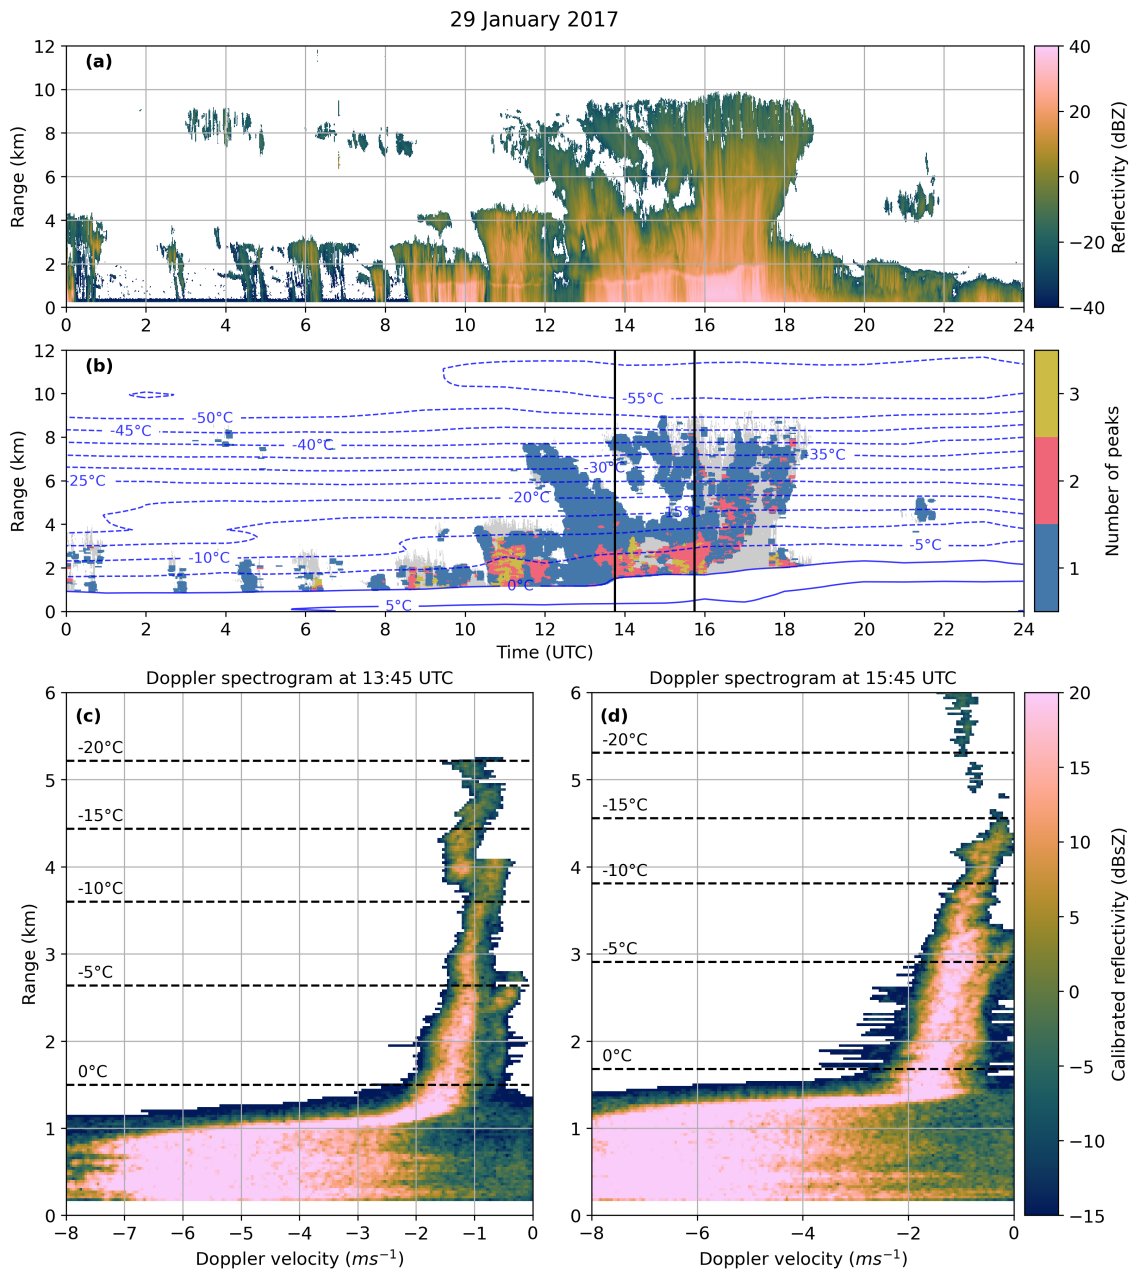

**Figure S4.** Reflectivity (a), peak finding results (b) and example spectrograms (c) and (d) for 29 January 2017.

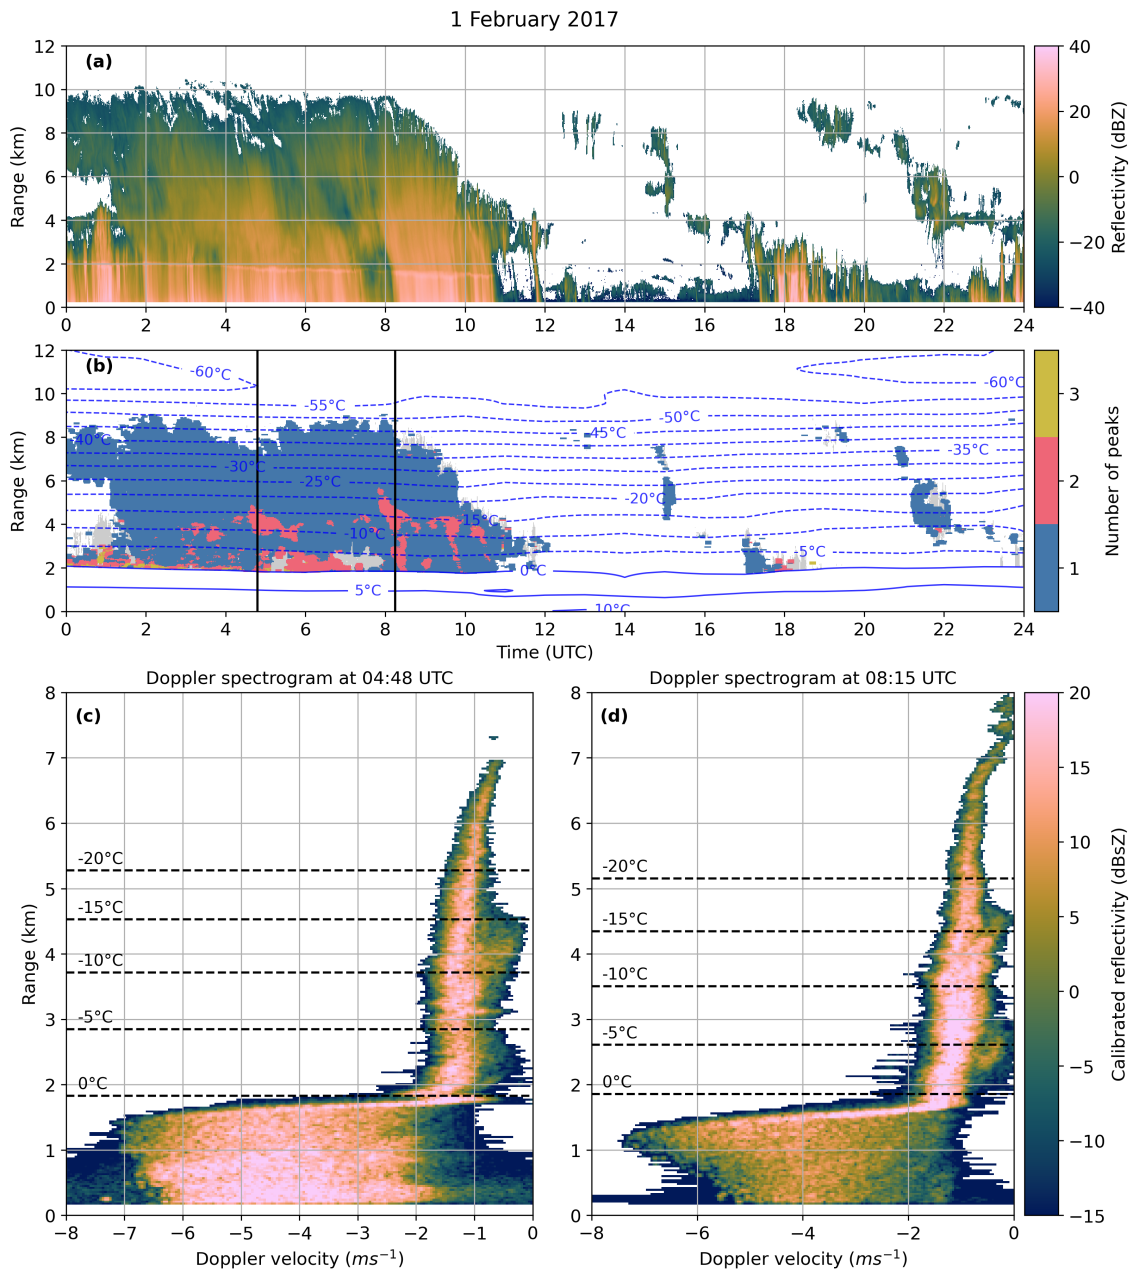

**Figure S5.** Reflectivity (a), peak finding results (b) and example spectrograms (c) and (d) for 1 February 2017.

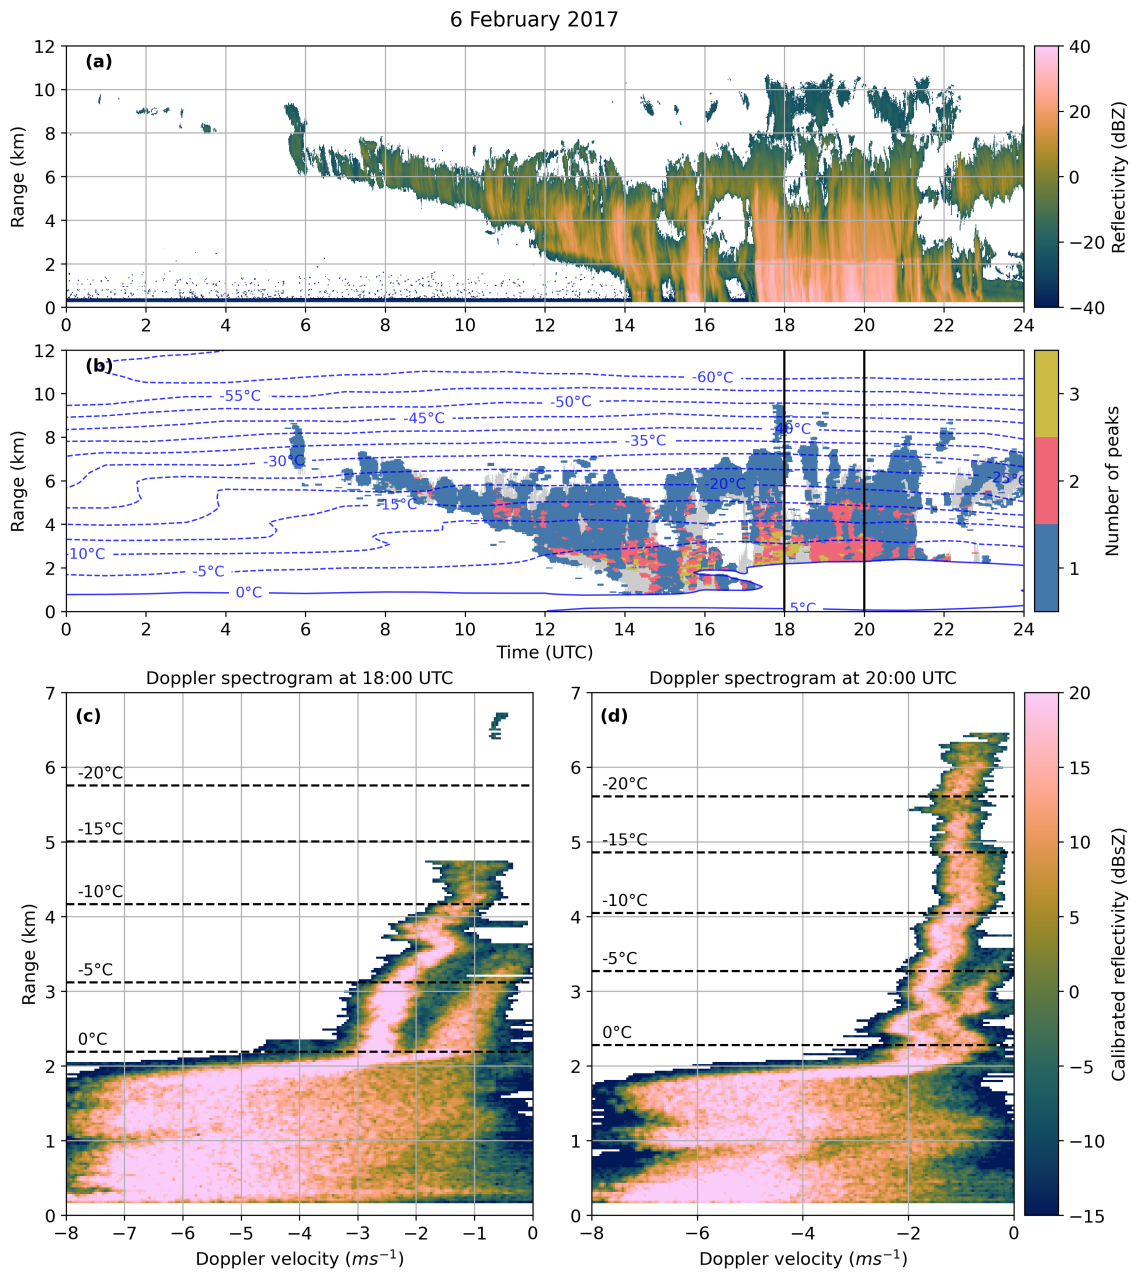

**Figure S6.** Reflectivity (a), peak finding results (b) and example spectrograms (c) and (d) for 6 February 2017.

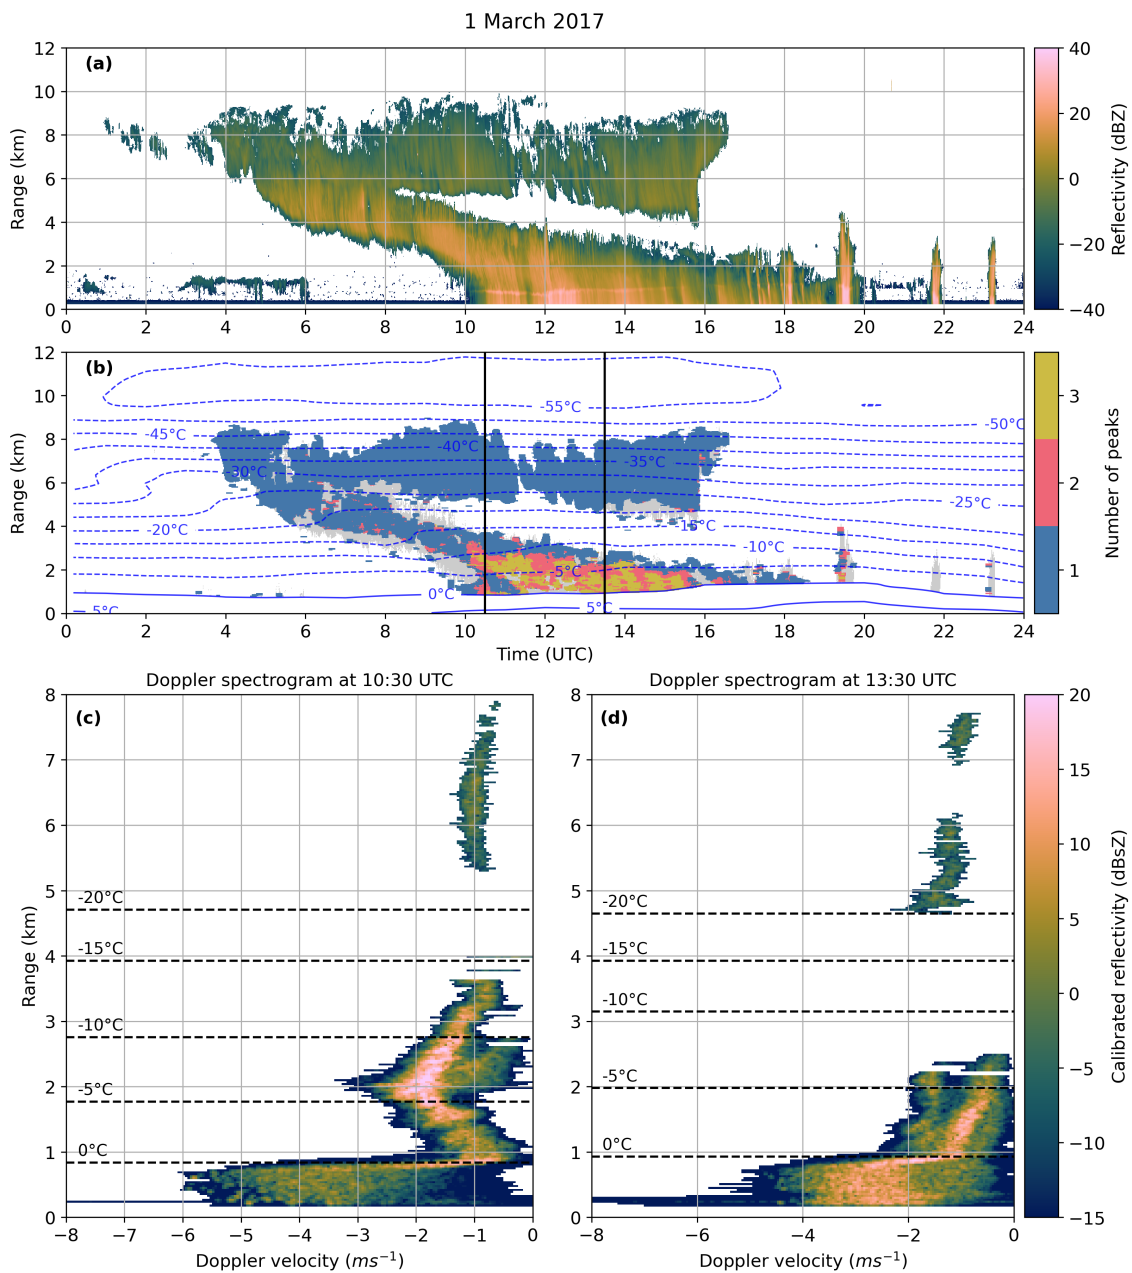

**Figure S7.** Reflectivity (a), peak finding results (b) and example spectrograms (c) and (d) for 1 March 2017.

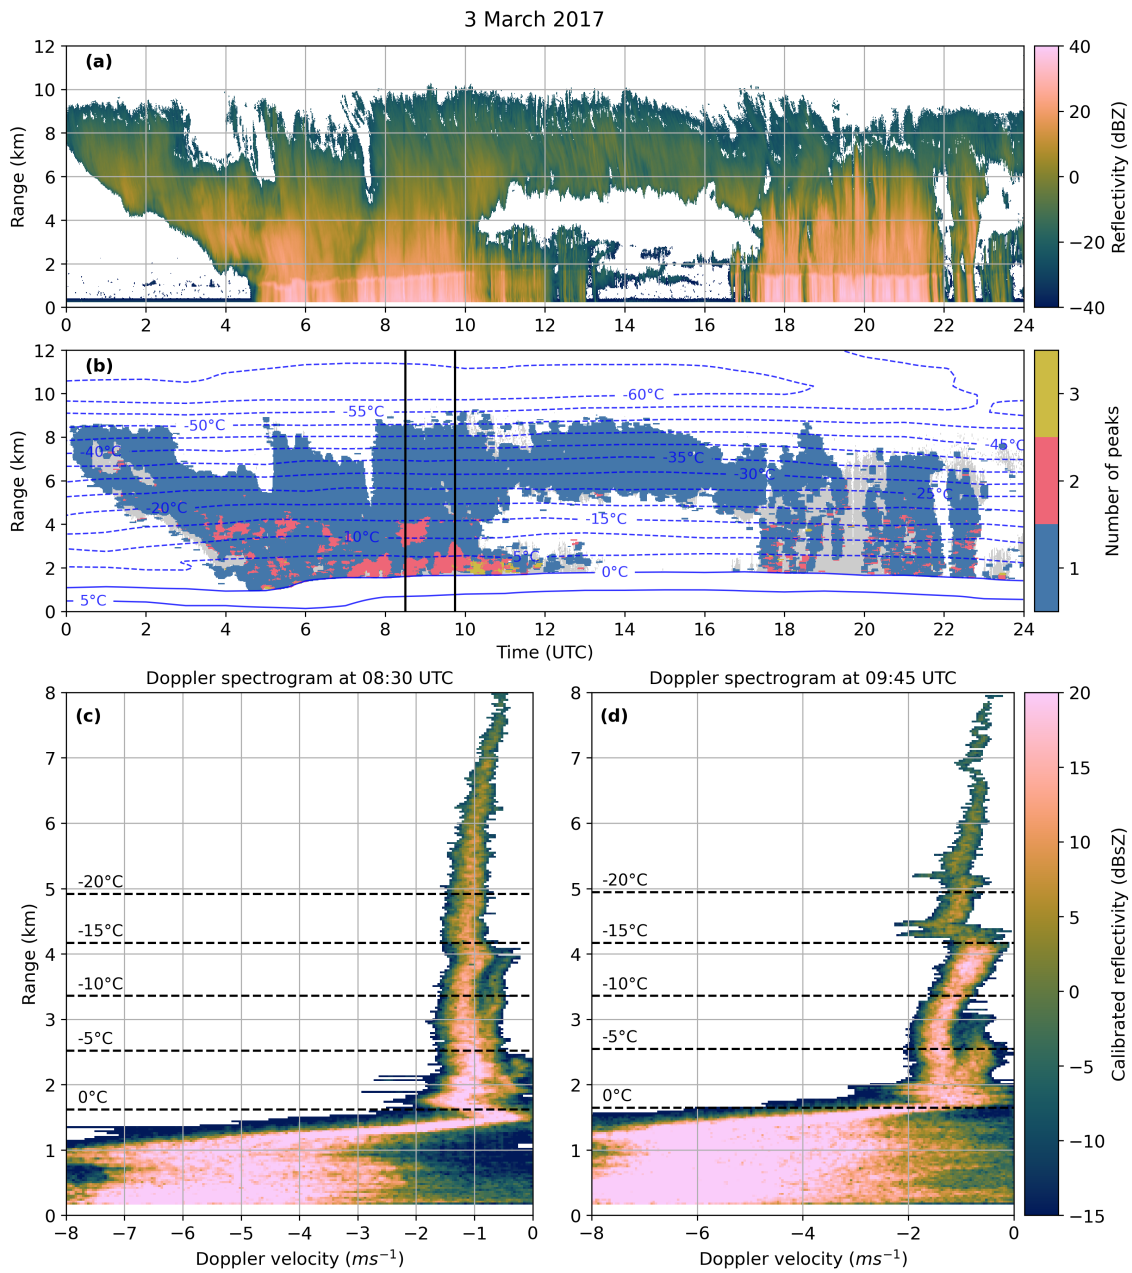

**Figure S8.** Reflectivity (a), peak finding results (b) and example spectrograms (c) and (d) for 3 March 2017.

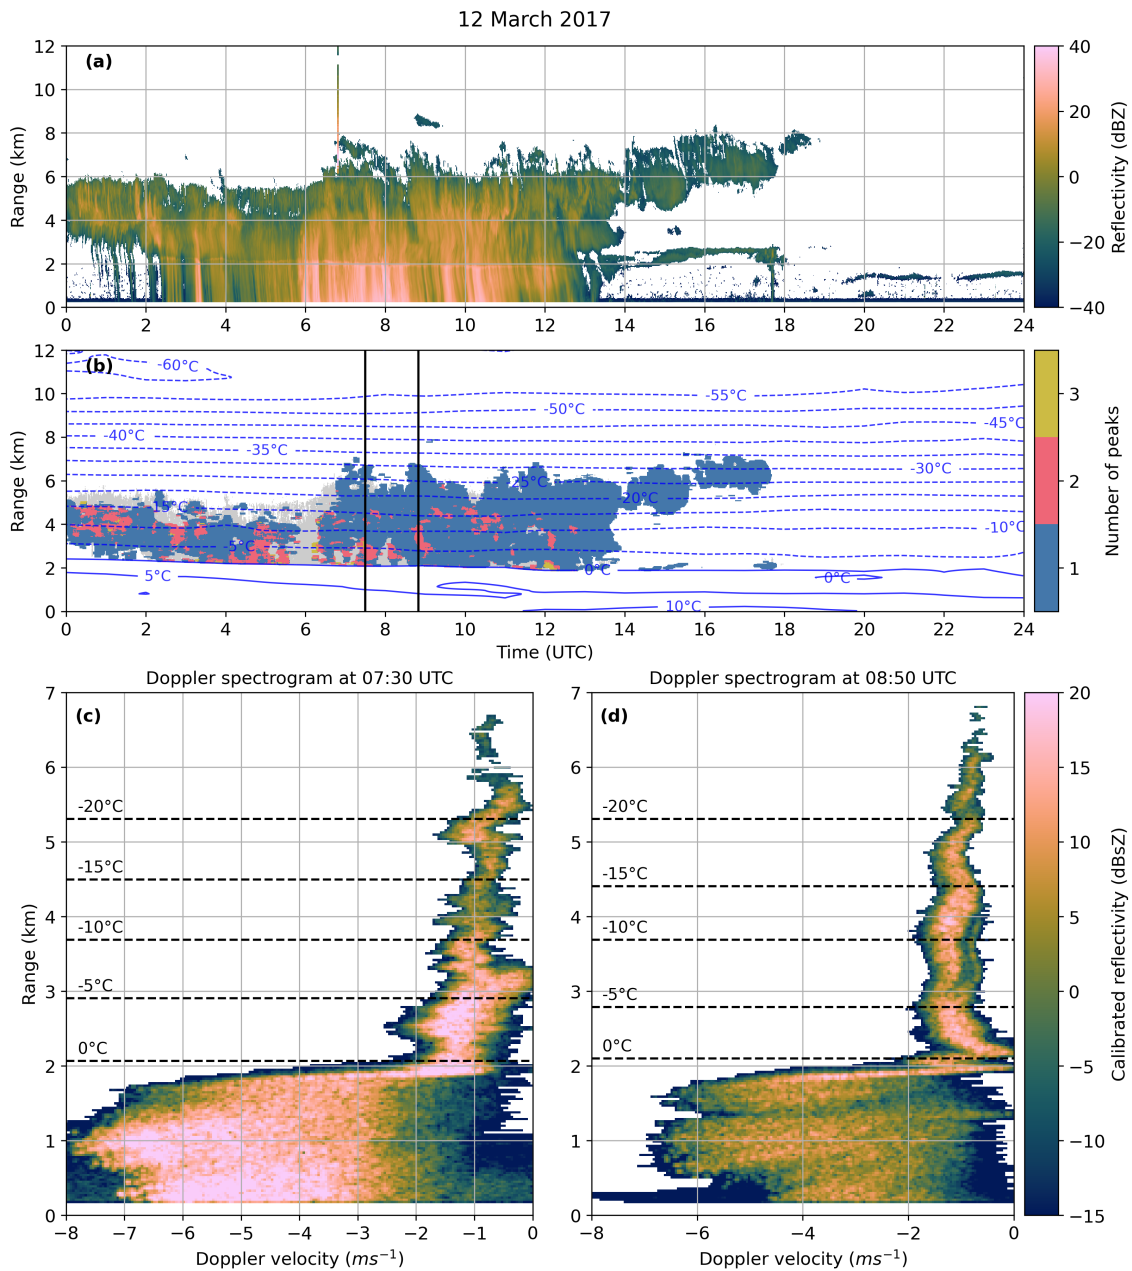

**Figure S9.** Reflectivity (a), peak finding results (b) and example spectrograms (c) and (d) for 12 March 2017.

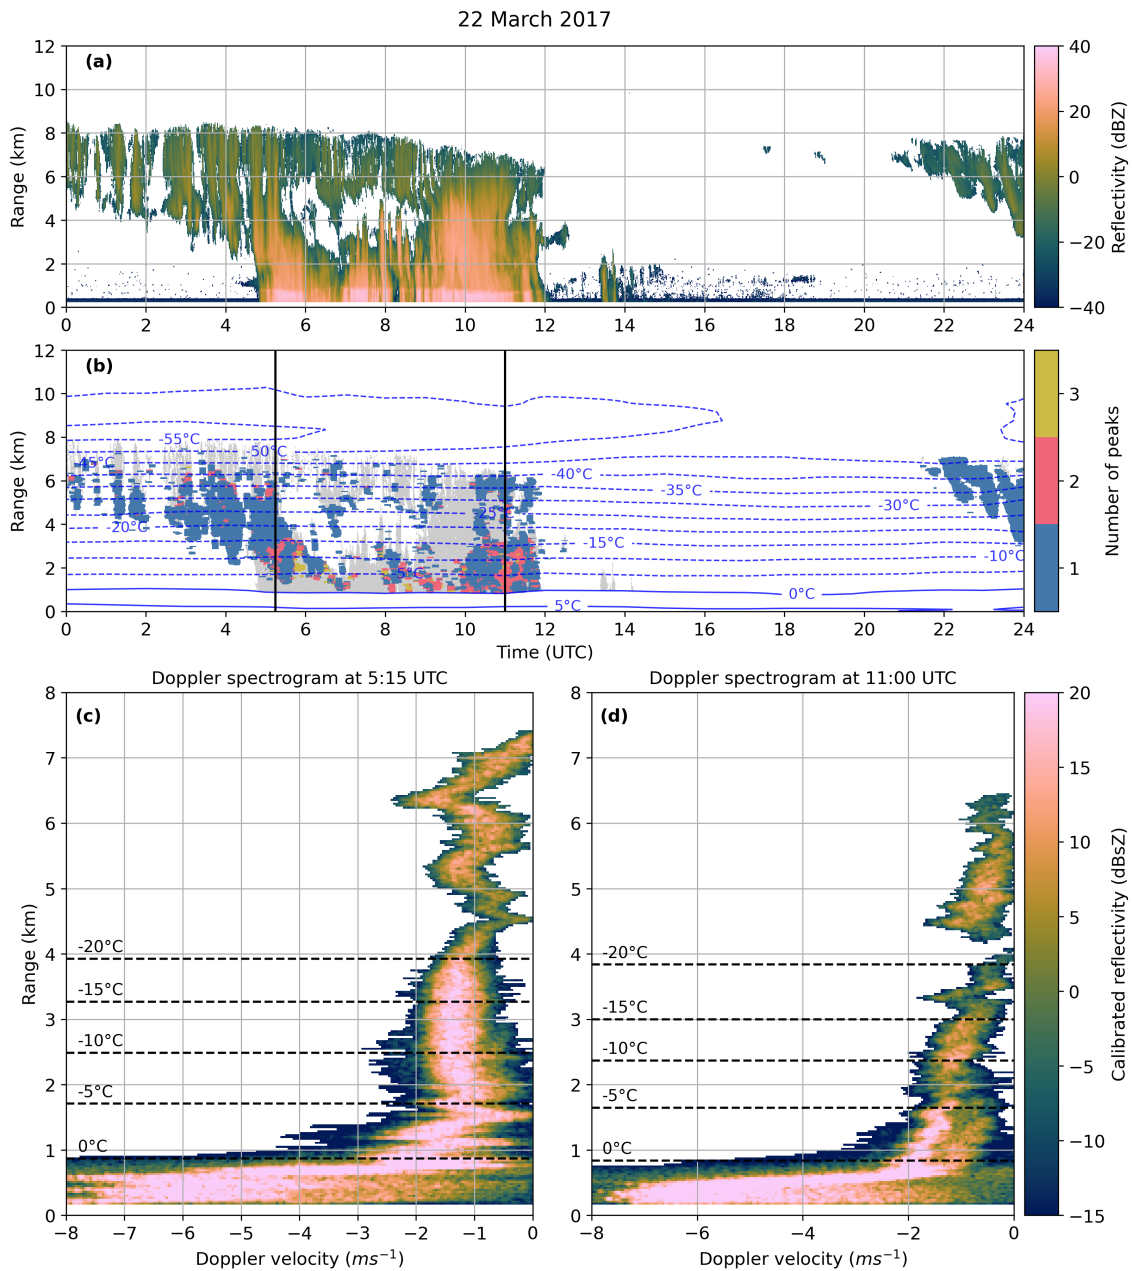

**Figure S10.** Reflectivity (a), peak finding results (b) and example spectrograms (c) and (d) for 22 March 2017.

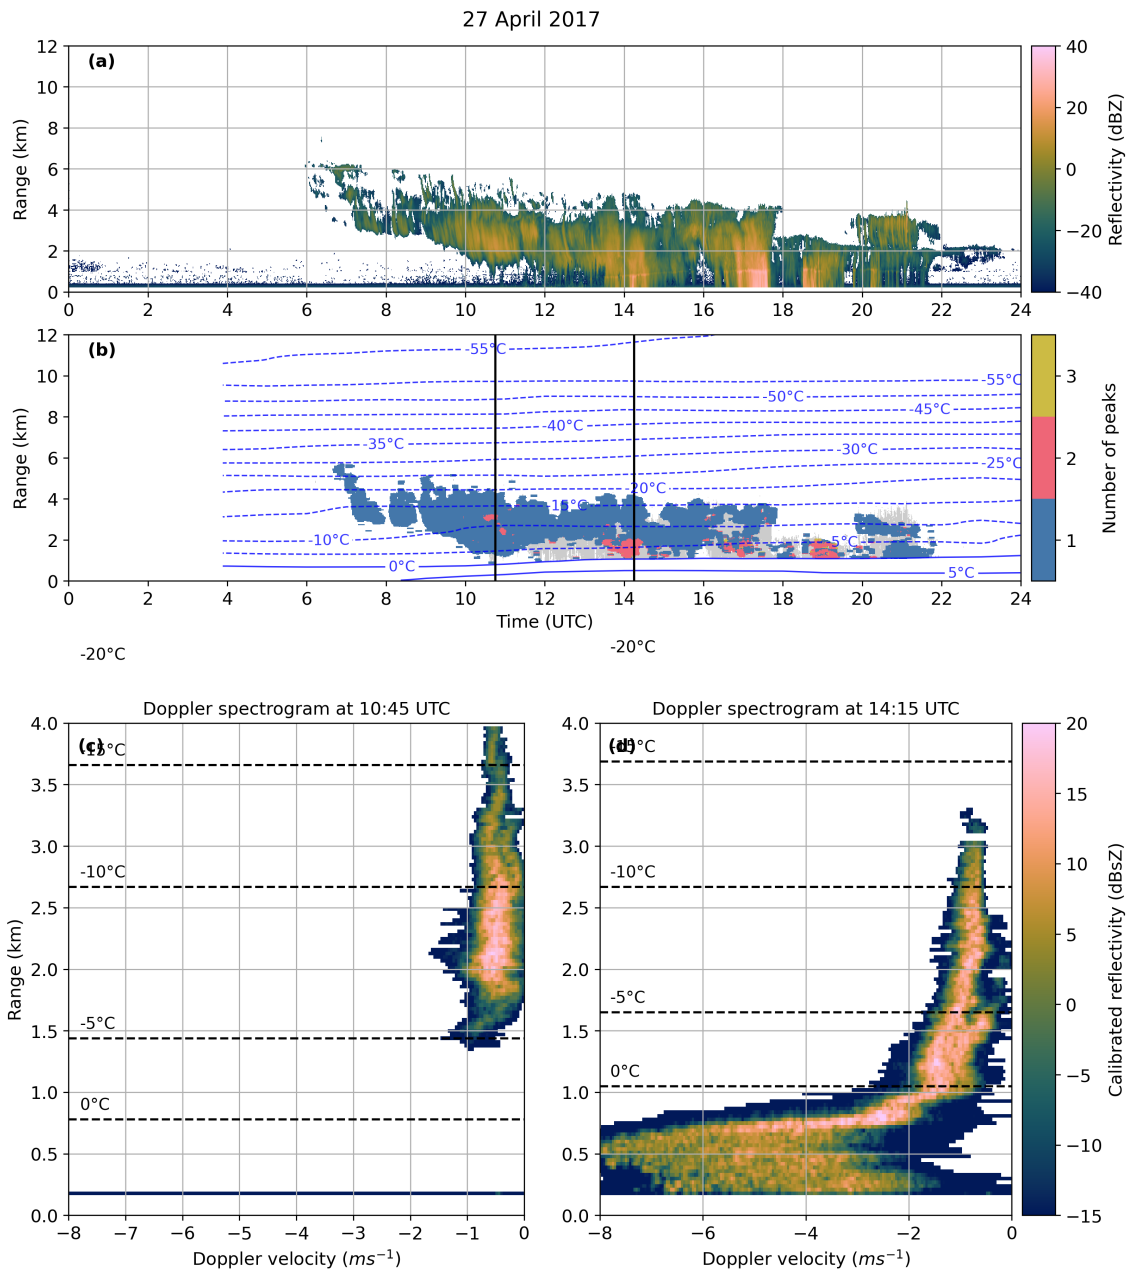

**Figure S11.** Reflectivity (a), peak finding results (b) and example spectrograms (c) and (d) for 27 April 2017.

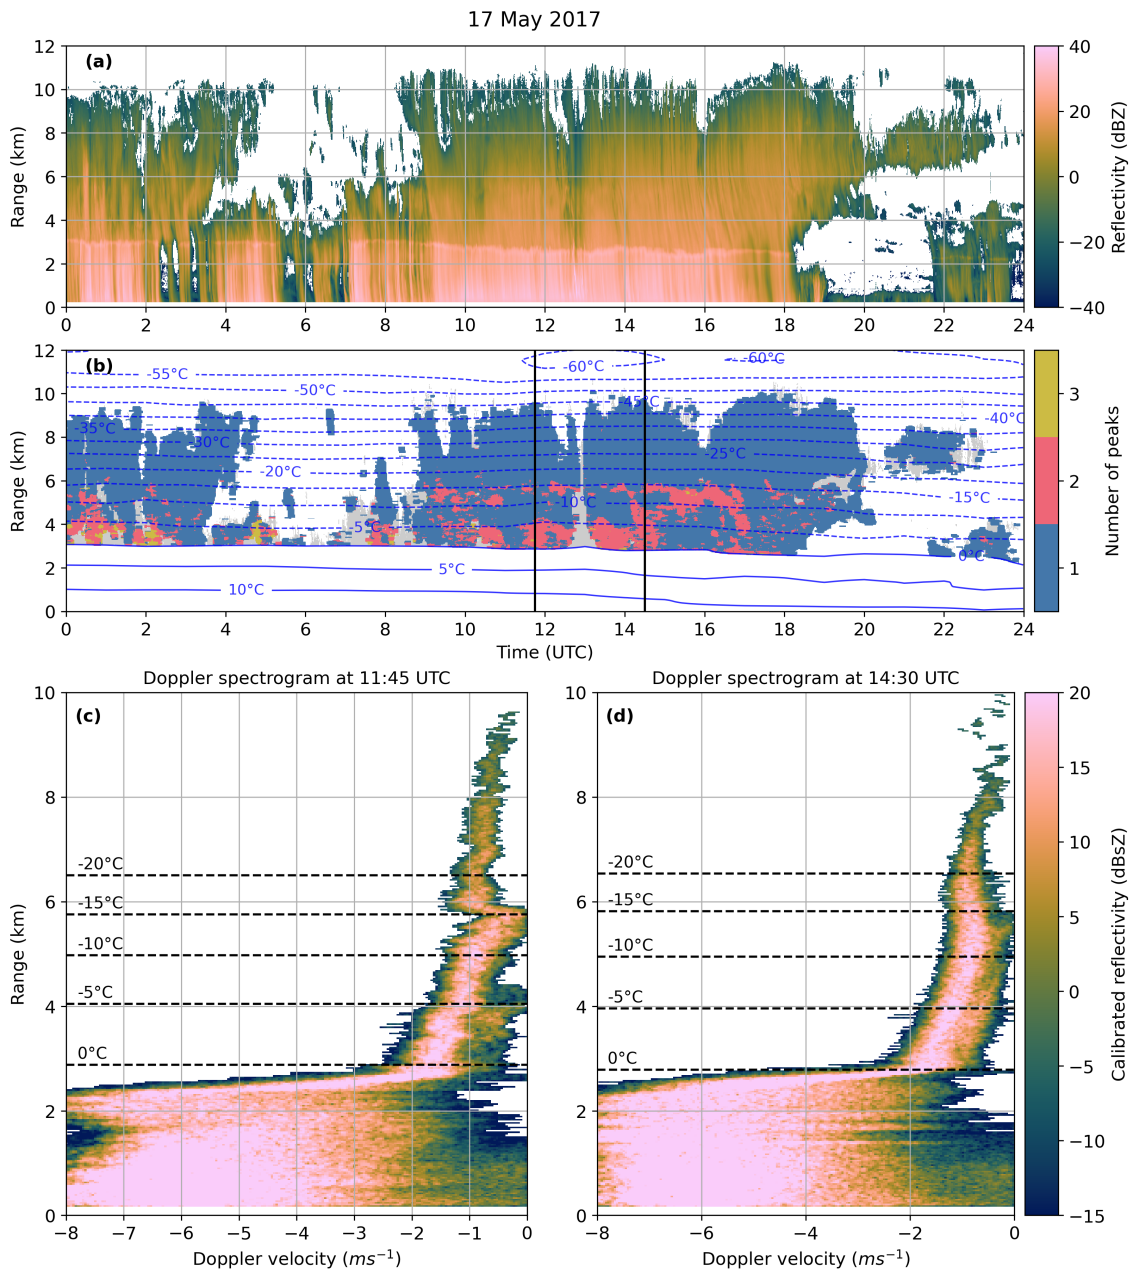

**Figure S12.** Reflectivity (a), peak finding results (b) and example spectrograms (c) and (d) for 17 May 2017.

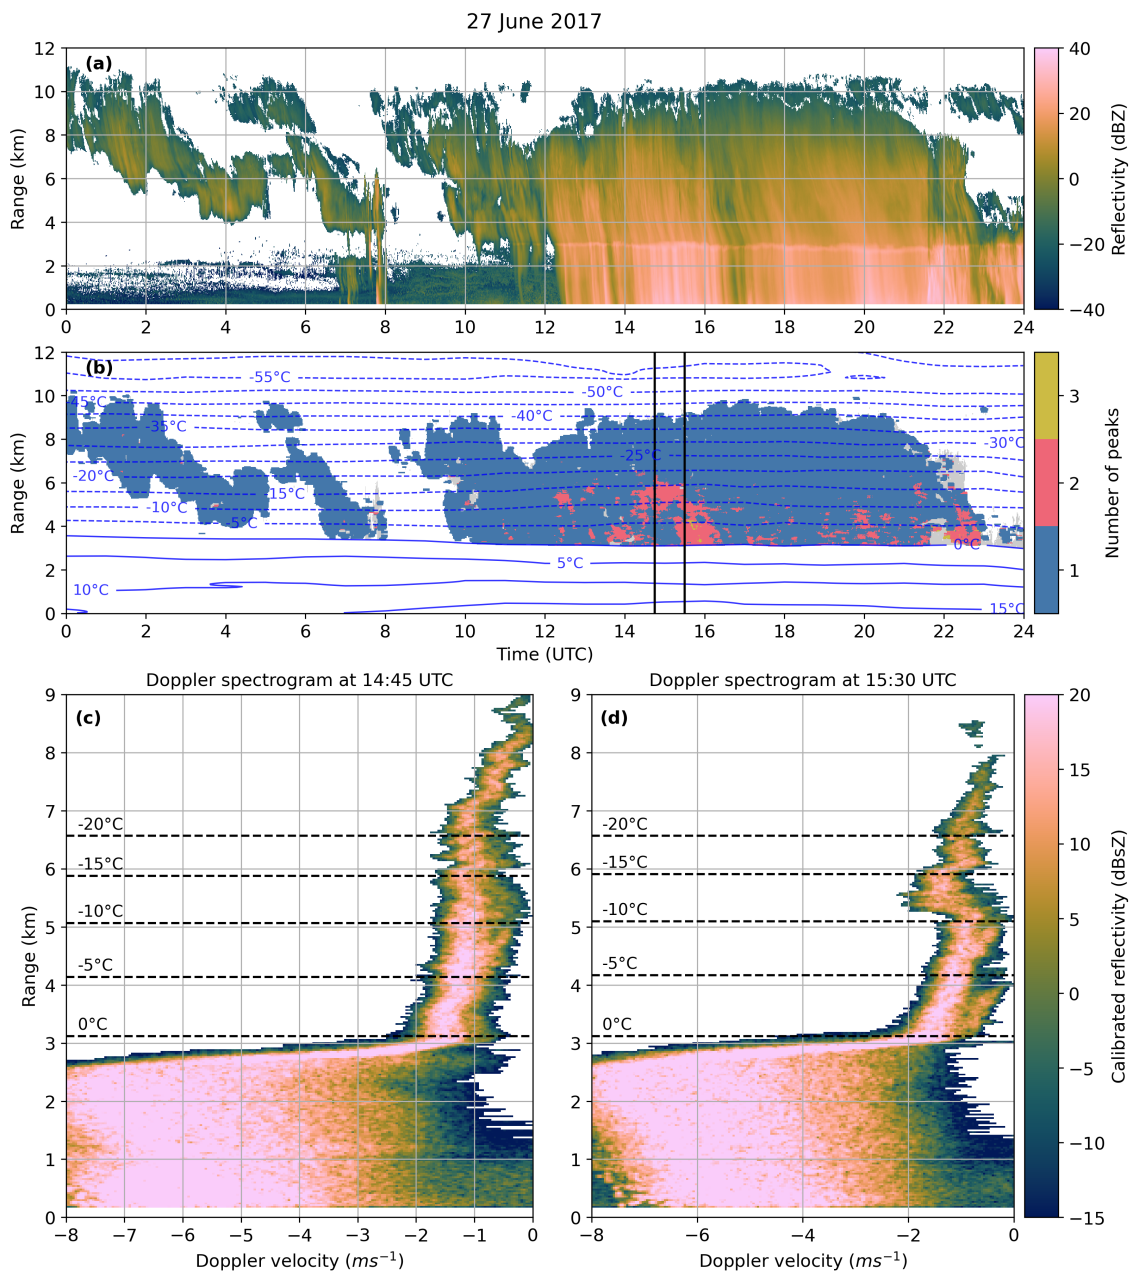

**Figure S13.** Reflectivity (a), peak finding results (b) and example spectrograms (c) and (d) for 27 June 2017.

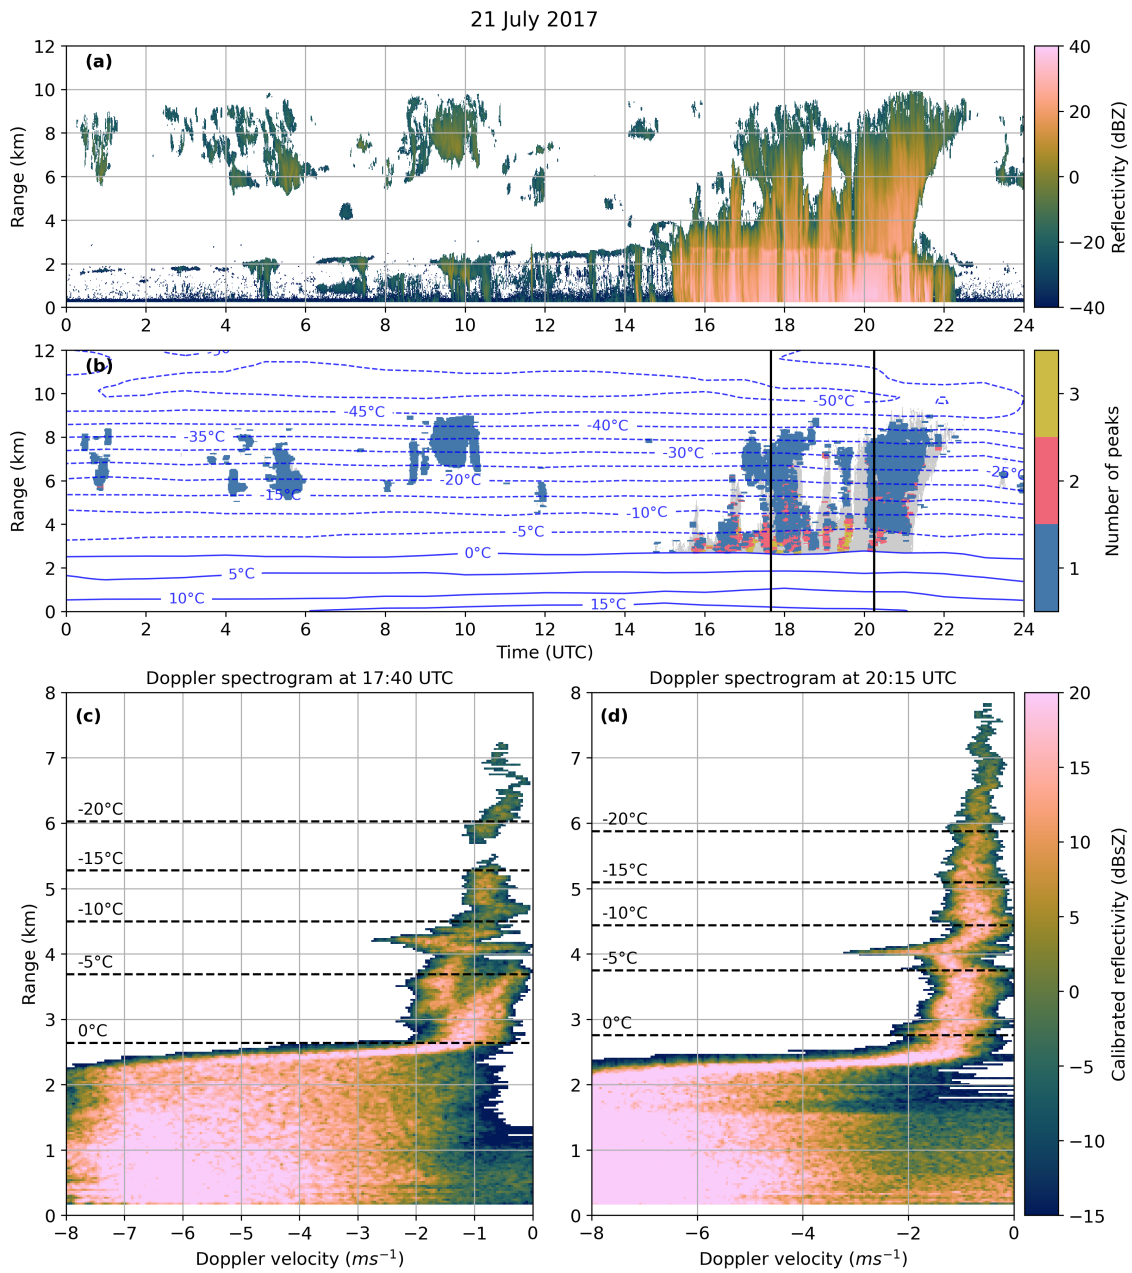

**Figure S14.** Reflectivity (a), peak finding results (b) and example spectrograms (c) and (d) for 21 July 2017.

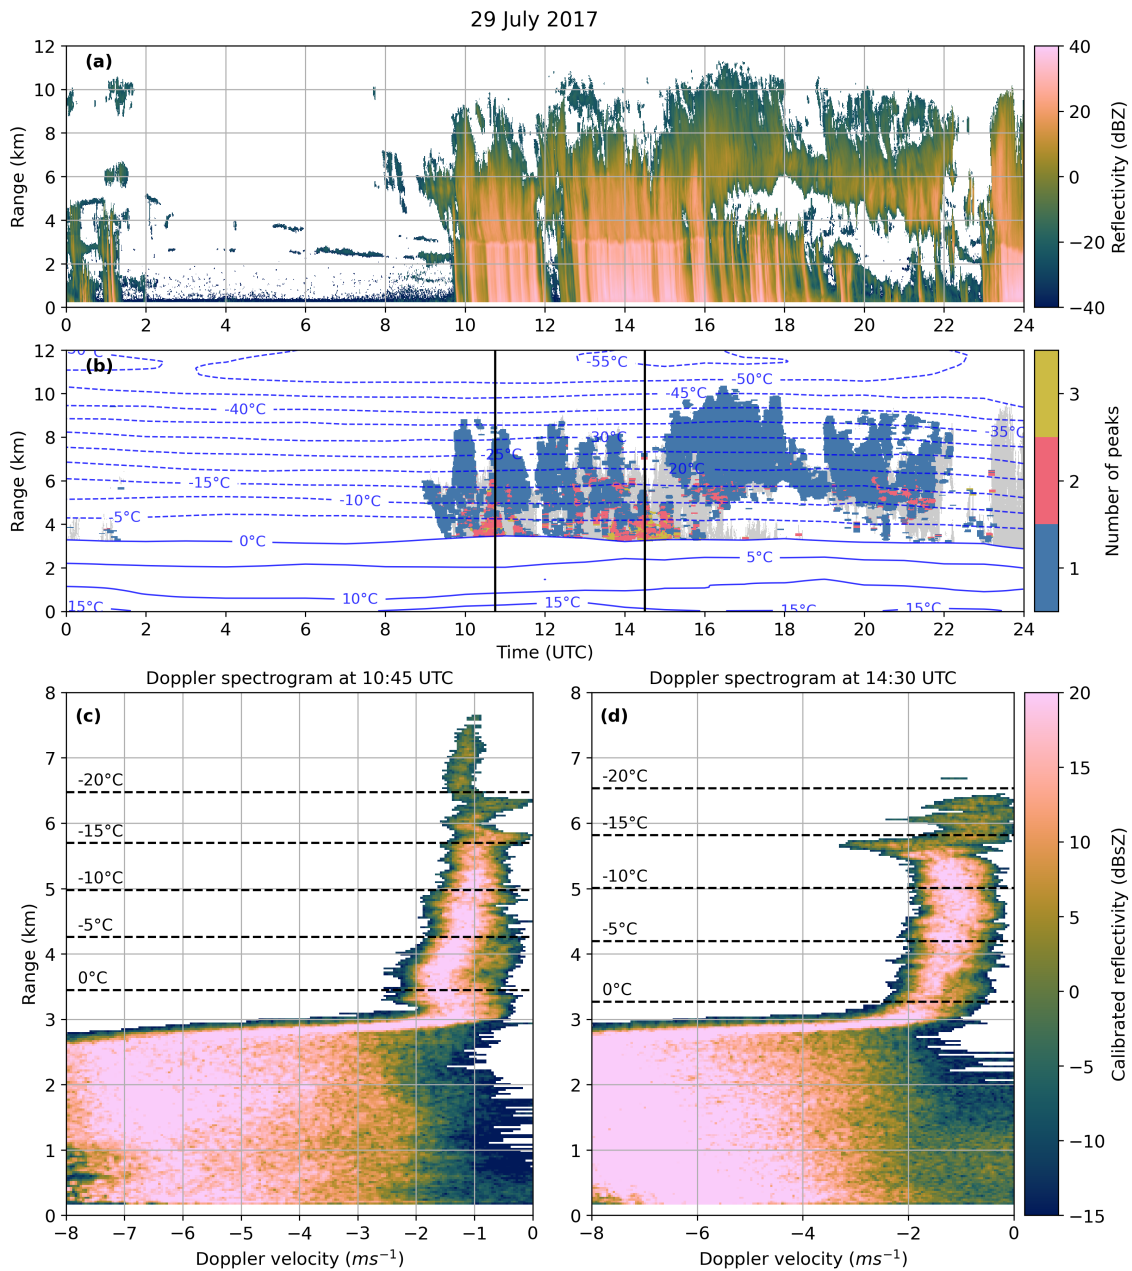

**Figure S15.** Reflectivity (a), peak finding results (b) and example spectrograms (c) and (d) for 29 July 2017.

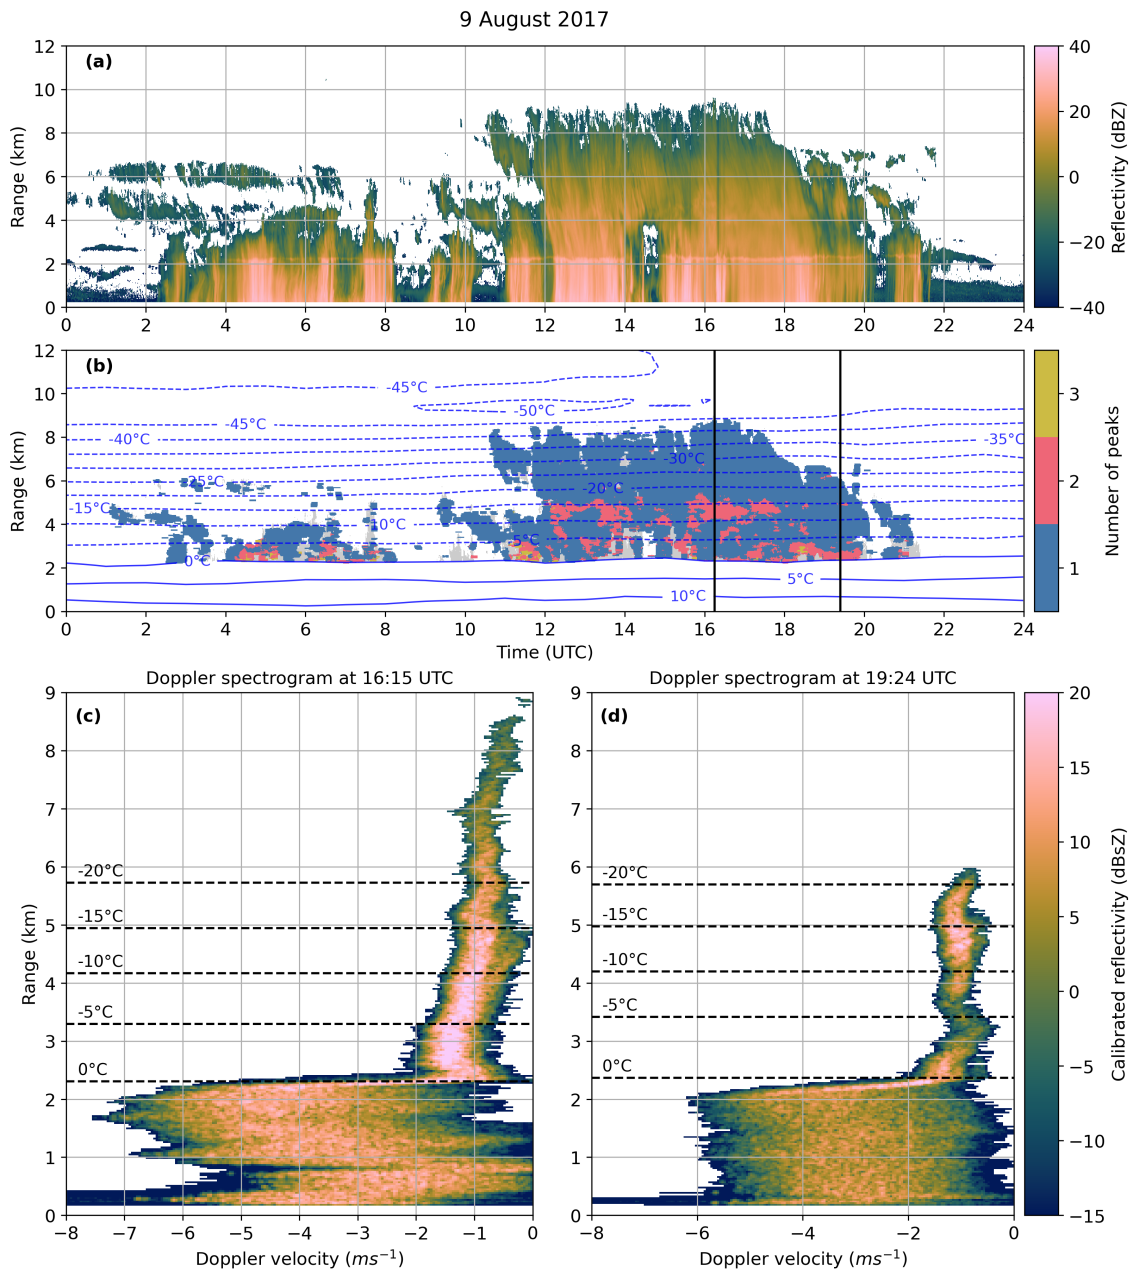

**Figure S16.** Reflectivity (a), peak finding results (b) and example spectrograms (c) and (d) for 9 August 2017.

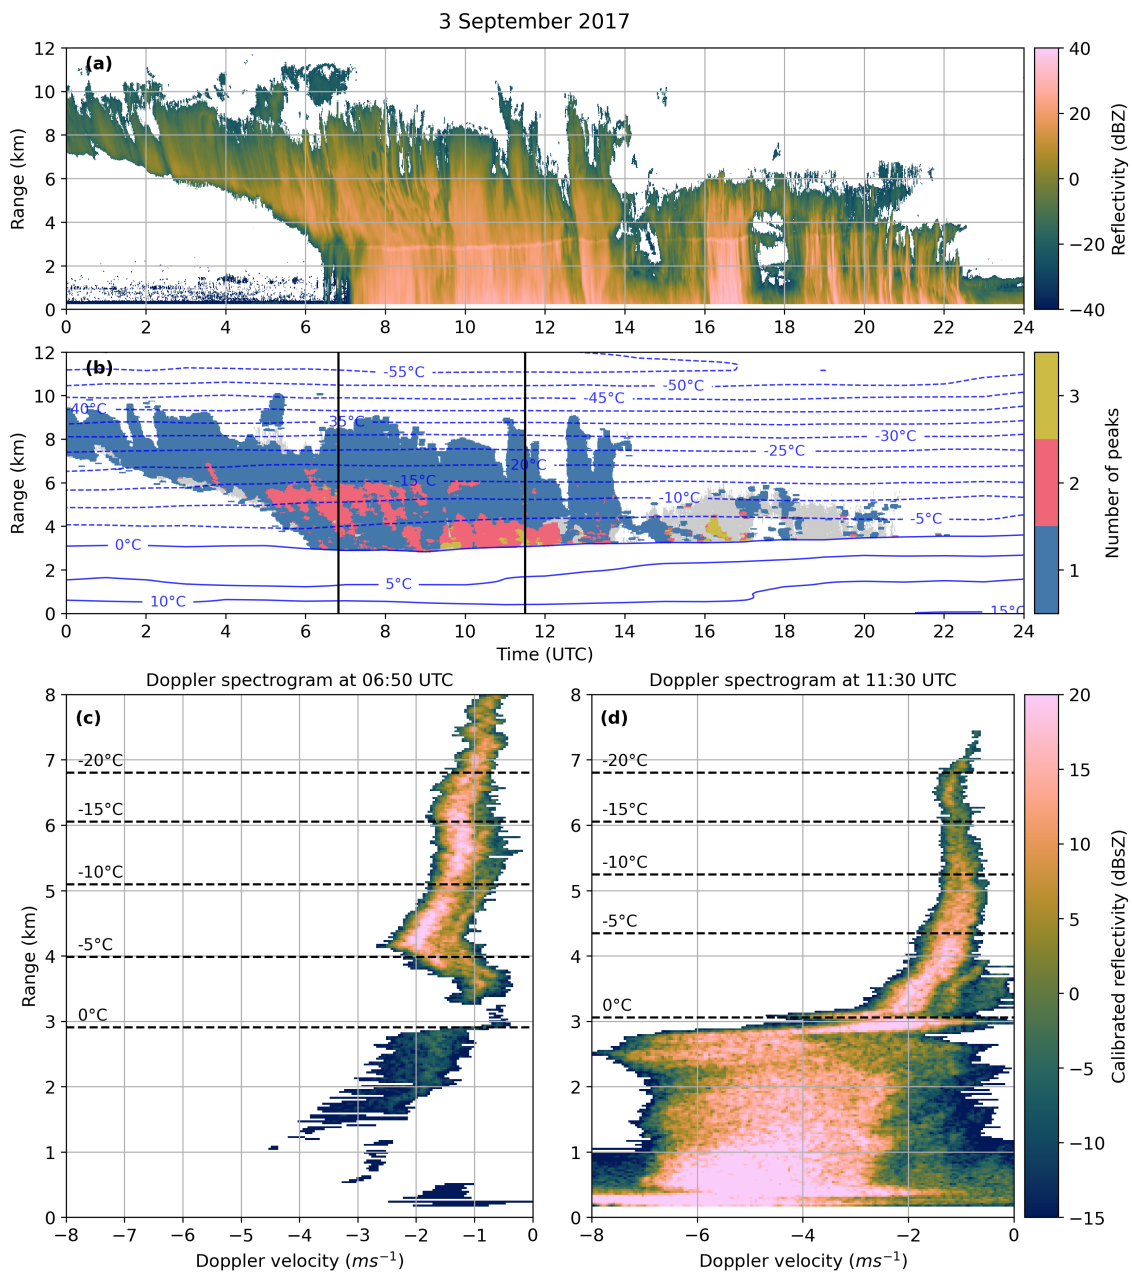

**Figure S17.** Reflectivity (a), peak finding results (b) and example spectrograms (c) and (d) for 3 September 2017.

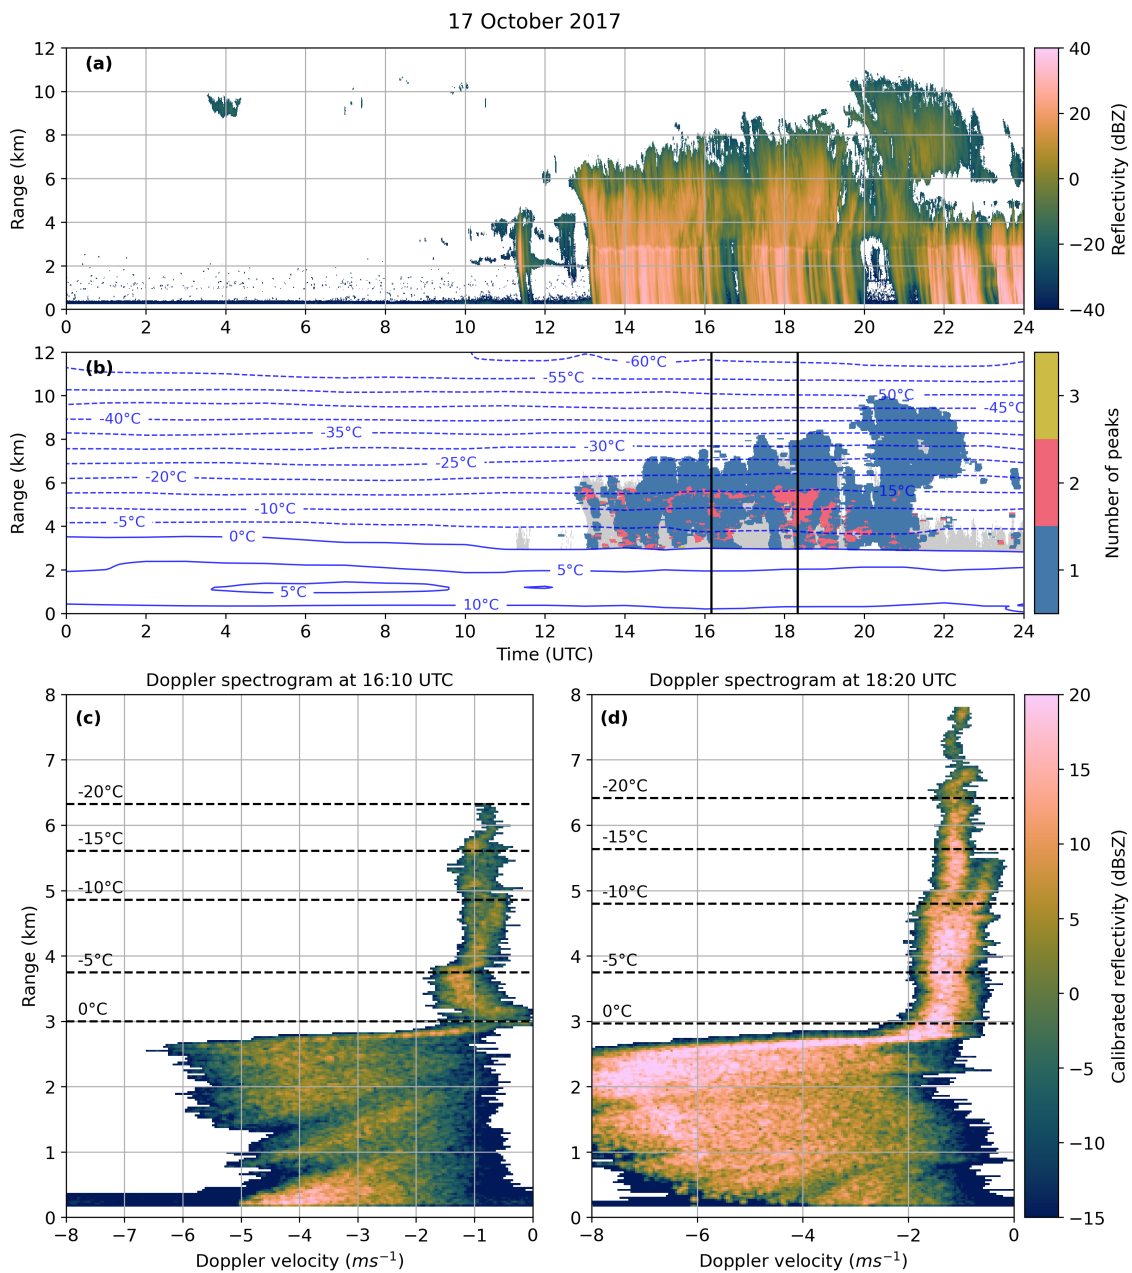

**Figure S18.** Reflectivity (a), peak finding results (b) and example spectrograms (c) and (d) for 17 October 2017.

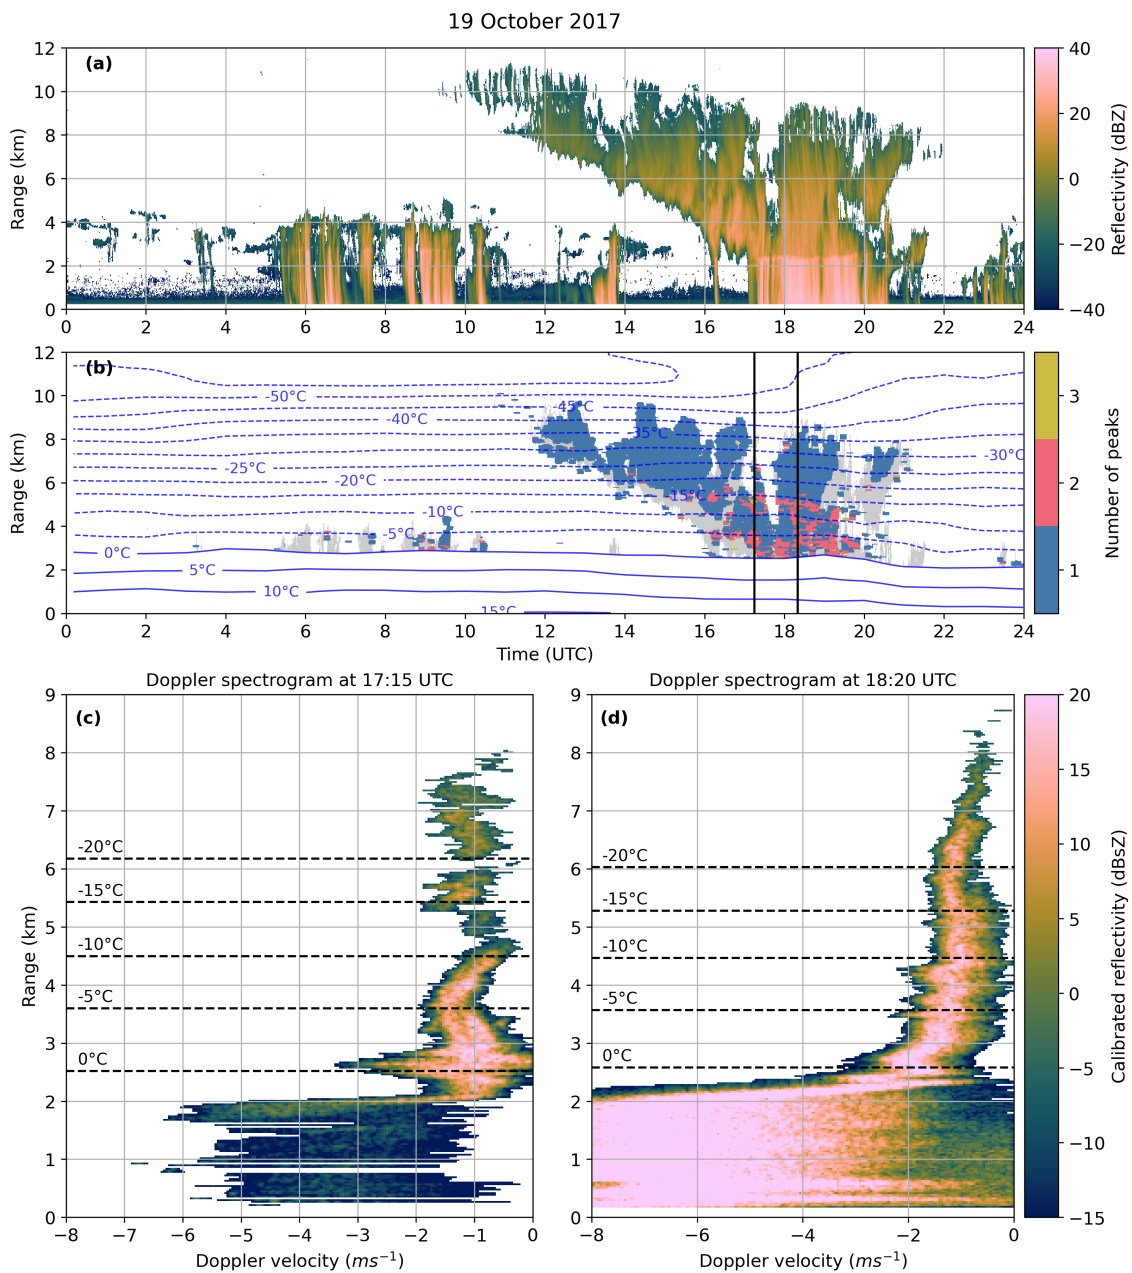

**Figure S19.** Reflectivity (a), peak finding results (b) and example spectrograms (c) and (d) for 19 October 2017.

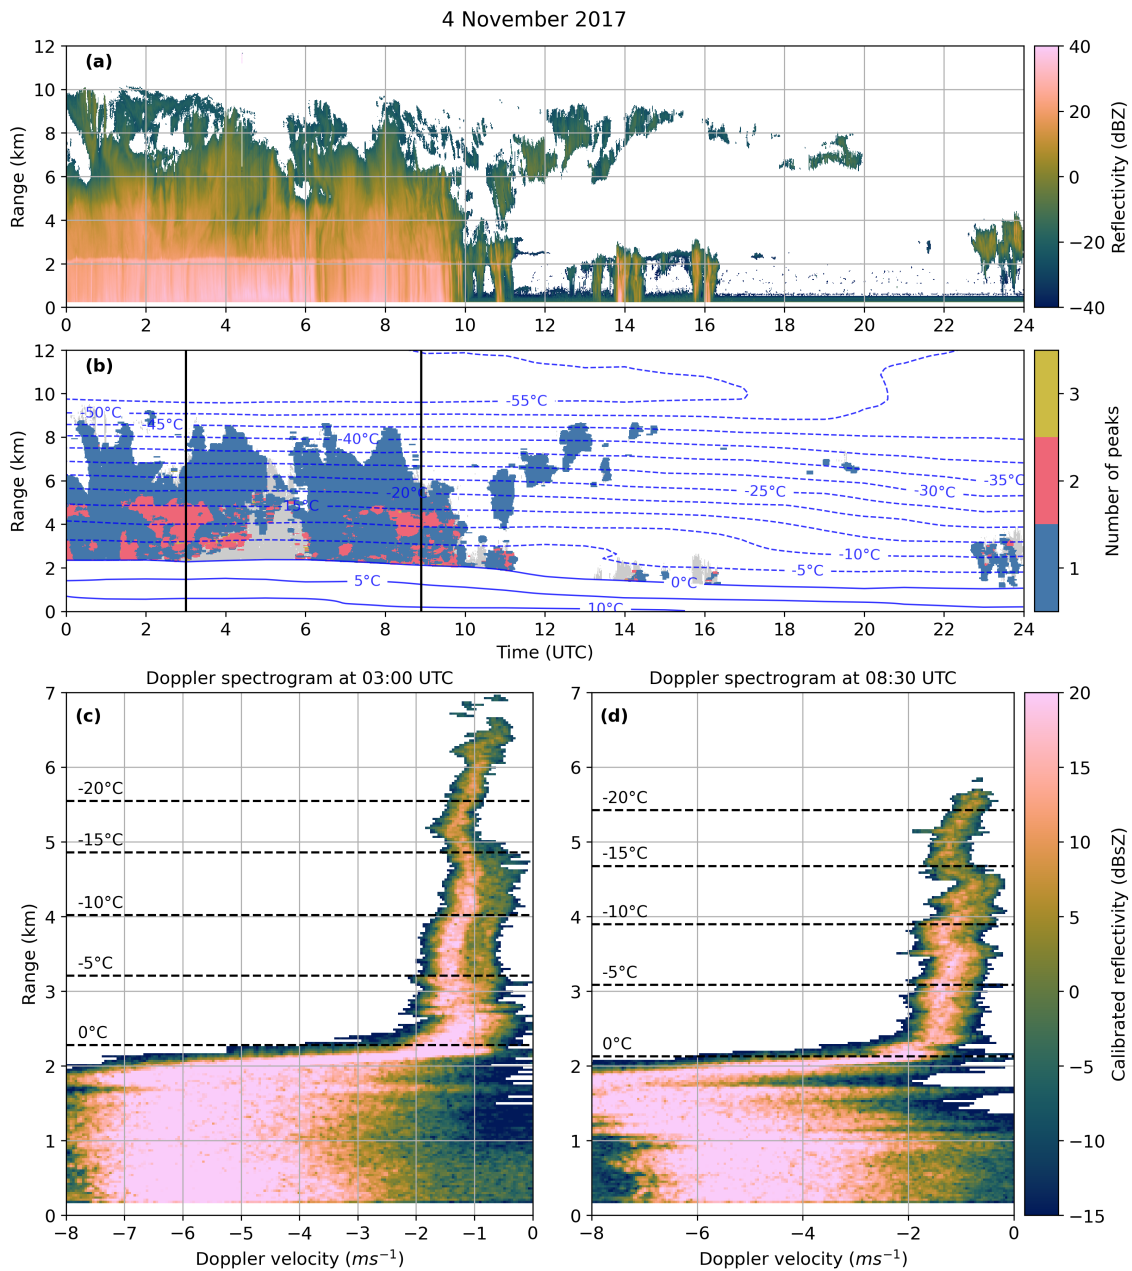

**Figure S20.** Reflectivity (a), peak finding results (b) and example spectrograms (c) and (d) for 4 November 2017.

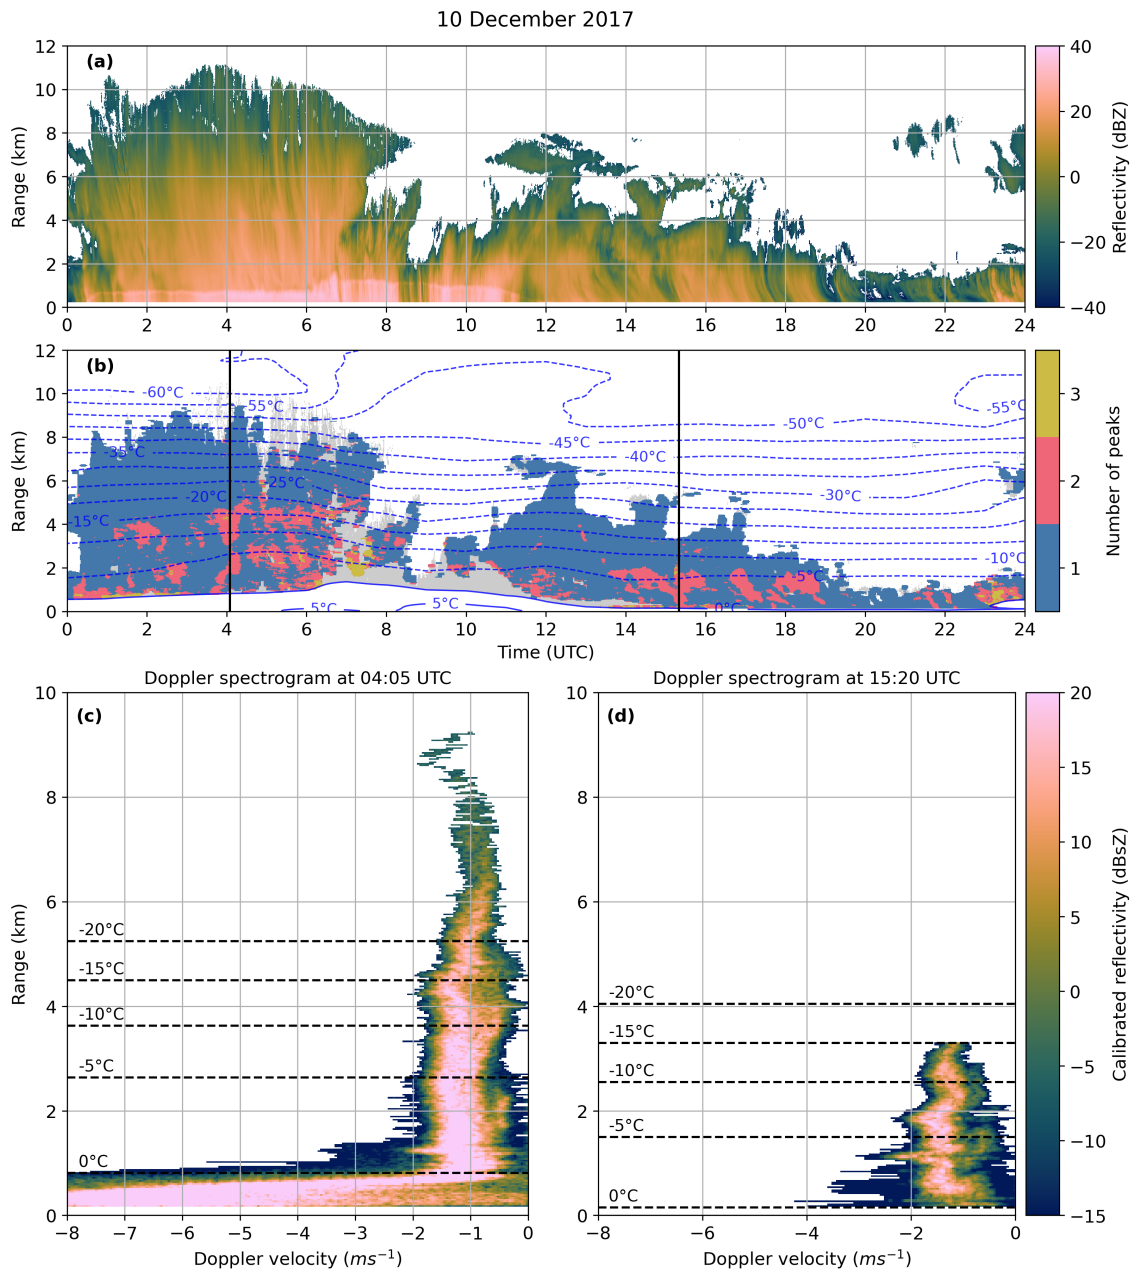

**Figure S21.** Reflectivity (a), peak finding results (b) and example spectrograms (c) and (d) for 10 December 2017.

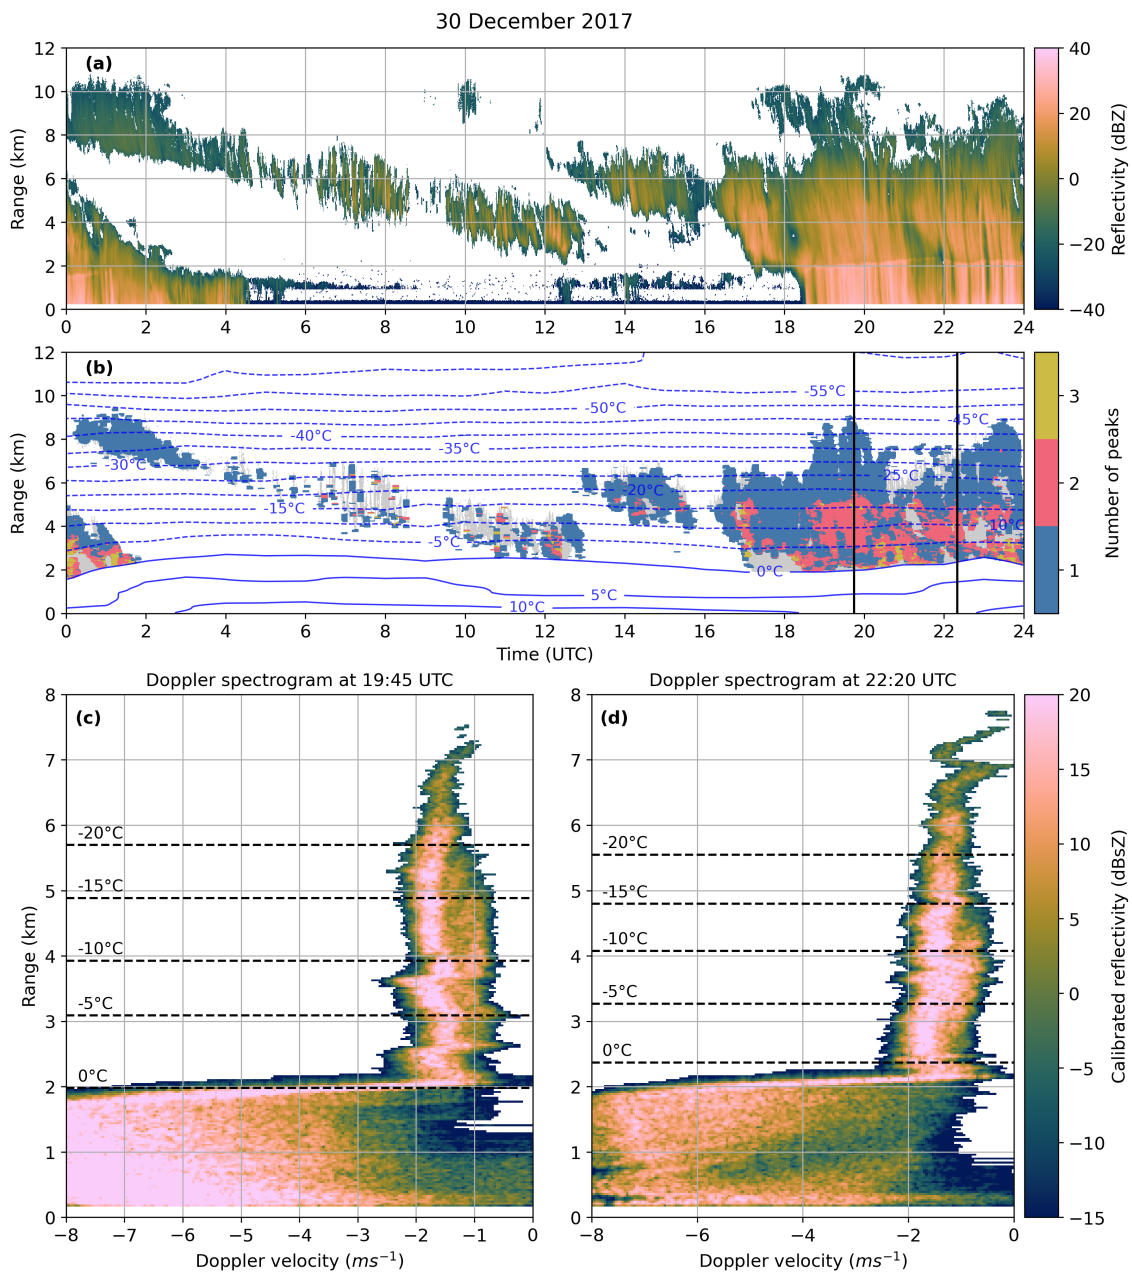

**Figure S22.** Reflectivity (a), peak finding results (b) and example spectrograms (c) and (d) for 30 December 2017.

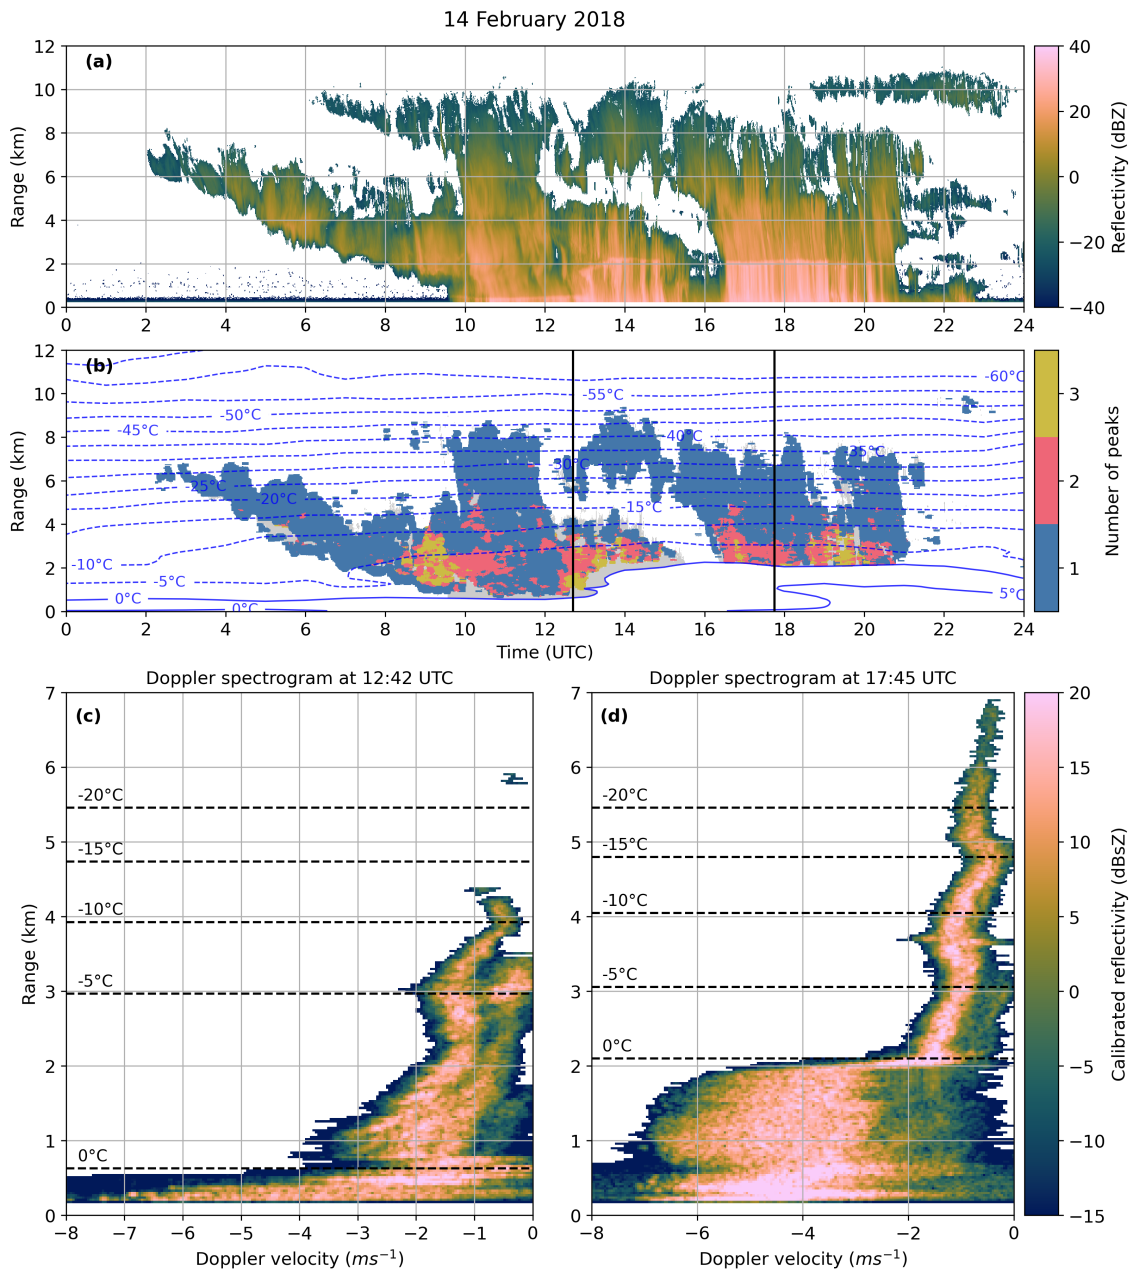

**Figure S23.** Reflectivity (a), peak finding results (b) and example spectrograms (c) and (d) for 14 February 2018.
